# Supplementary material for: Domain‐specific and domain‐general neural network engagement during human–robot interactions
Source: PubMed Central journal article supplement — Eur J Neurosci. 2022 Sep 27;56(10):5902–16. doi: 10.1111/ejn.15823 (PMC9828180; doi:10.1111/ejn.15823), 2022-09-27
Supplement: EJN-56-5902-s001.pdf [file EJN-56-5902-s001.pdf]

# Supplementary material

*for*

Domain-specific and domain-general neural network engagement during human-robot interactions

*by*

Ann Hogenhuis and Ruud Hortensius

*published in*

European Journal of Neuroscience

---

**Table S1. Coordinates for the Theory-of-Mind network**

---

| <i>Region</i>                   | <i>MNI Coordinates</i> |          |          |
|---------------------------------|------------------------|----------|----------|
|                                 | <i>x</i>               | <i>y</i> | <i>z</i> |
| Dorsomedial prefrontal cortex   | -6                     | 54       | 36       |
| Middle medial prefrontal cortex | -4                     | 58       | 16       |
| Ventromedial prefrontal cortex  | -4                     | 56       | -16      |
| Precuneus                       | 0                      | -54      | 34       |
| Left temporoparietal junction   | -48                    | -62      | 30       |
| Right temporoparietal junction  | 48                     | -60      | 30       |

---

Coordinates are based on Richardson et al. (2018).

---

**Table S2. Coordinates for the person perception network**

---

| <i>Region</i>                            | <i>MNI Coordinates</i> |          |          |
|------------------------------------------|------------------------|----------|----------|
|                                          | <i>x</i>               | <i>y</i> | <i>z</i> |
| Left occipital face area                 | -40                    | -76      | -18      |
| Right occipital face area                | 44                     | -76      | -12      |
| Left fusiform face area                  | -40                    | -52      | -18      |
| Right fusiform face area                 | 38                     | -42      | -22      |
| Left posterior superior temporal sulcus  | -54                    | -36      | 6        |
| Right posterior superior temporal sulcus | 48                     | -38      | 4        |
| Left extrastriate body area              | -48                    | -74      | 10       |
| Right extrastriate body area             | 50                     | -70      | 10       |

---

Coordinates are based on Julian et al. (2012).

---

**Table S3. Coordinates for the object-selective regions**

---

| <i>Region</i>                   | <i>MNI Coordinates</i> |          |          |
|---------------------------------|------------------------|----------|----------|
|                                 | <i>x</i>               | <i>y</i> | <i>z</i> |
| Left fusiform gyrus             | -26                    | -60      | -10      |
| Right fusiform gyrus            | 30                     | -50      | -8       |
| Left lateral occipital complex  | -46                    | -72      | -4       |
| Right lateral occipital complex | 46                     | -70      | -4       |
| Left superior parietal lobule   | -24                    | -56      | 60       |
| Right superior parietal lobule  | 24                     | -52      | 64       |
| Left middle occipital gyrus     | -30                    | -84      | 12       |
| Right middle occipital gyrus    | 36                     | -84      | 12       |

---

Bilateral lateral occipital complex and superior parietal lobule coordinates are based on Julian et al. (2012), while the bilateral fusiform gyrus, superior parietal lobule, and middle occipital gyrus coordinates are based on Henschel, Hortensius and Cross (2020) using independent coordinates from Dubey et al. (2020).

---

**Table S4 Coordinates for the language network**

---

| <i>Region</i>                                       | <i>MNI Coordinates</i> |          |          |
|-----------------------------------------------------|------------------------|----------|----------|
|                                                     | <i>x</i>               | <i>y</i> | <i>z</i> |
| Left orbital portion of the inferior frontal gyrus  | -42                    | 28       | -4       |
| Left inferior frontal gyrus                         | -48                    | 18       | 20       |
| Left middle frontal gyrus                           | -44                    | -6       | 58       |
| Left anterior temporal lobe                         | -52                    | -8       | -14      |
| Left posterior temporal lobe                        | -48                    | -38      | 2        |
| Left angular gyrus                                  | -48                    | -62      | 20       |
| Right orbital portion of the inferior frontal gyrus | 46                     | 30       | 4        |
| Right inferior frontal gyrus                        | 42                     | 18       | 22       |
| Right middle frontal gyrus                          | 50                     | -4       | 52       |
| Right anterior temporal lobe                        | 48                     | -4       | -18      |
| Right posterior temporal lobe                       | 44                     | -32      | 0        |
| Right angular gyrus                                 | 46                     | -62      | 20       |

---

Coordinates of the regions are based on the peak voxels of the group maps masked with the network parcels using data from Diachek and colleagues (2020; Experiment 1,  $n = 383$ , <https://osf.io/pdtk9/>).

**Table S5 Coordinates for the multiple-demand network**

| <i>Region</i>                                         | <i>MNI Coordinates</i> |          |          |
|-------------------------------------------------------|------------------------|----------|----------|
|                                                       | <i>x</i>               | <i>y</i> | <i>z</i> |
| Left posterior parietal lobe                          | -16                    | -66      | 32       |
| Left middle parietal lobe                             | -44                    | -54      | 42       |
| Left anterior parietal lobe                           | -52                    | -44      | 48       |
| Left superior frontal gryus                           | -18                    | 16       | 62       |
| Left precentral gyrus                                 | -40                    | 18       | 42       |
| Left opercular portion of the inferior frontal gyrus  | -34                    | 18       | 34       |
| Left middle frontal gyrus                             | -40                    | 42       | 14       |
| Left orbital middle frontal gyrus                     | -40                    | 46       | 10       |
| Left insula                                           | -36                    | 14       | -6       |
| Left medial frontal gyrus                             | -2                     | 26       | 40       |
| Right posterior parietal lobe                         | 18                     | -62      | 32       |
| Right middle parietal lobe                            | 54                     | -52      | 40       |
| Right anterior parietal lobe                          | 54                     | -46      | 40       |
| Right superior frontal gryus                          | 22                     | 18       | 60       |
| Right precentral gyrus                                | 40                     | 18       | 50       |
| Right opercular portion of the inferior frontal gyrus | 38                     | 18       | 40       |
| Right middle frontal gyrus                            | 38                     | 22       | 48       |
| Right orbital middle frontal gyrus                    | 42                     | 48       | -2       |
| Right insula                                          | 30                     | 18       | -12      |
| Right medial frontal gyrus                            | 2                      | 32       | 34       |

Coordinates of the regions are based on the peak voxels of the group maps masked with the network parcels using data from Diachek and colleagues (2020; Experiment 1,  $n = 383$ , <https://osf.io/pdtk9/>).

**Table S6. Comparison of activity within each network when listening and speaking during interactions with a human and robotic agent**

| <i>Network</i>    | <i>Main effect of dynamics</i> |                  |             | <i>Main effect of type of interaction</i> |             |             | <i>Interaction between dynamics and type of interaction</i> |                  |             |
|-------------------|--------------------------------|------------------|-------------|-------------------------------------------|-------------|-------------|-------------------------------------------------------------|------------------|-------------|
|                   | <i>F</i>                       | <i>p</i>         | $\eta^2_G$  | <i>F</i>                                  | <i>p</i>    | $\eta^2_G$  | <i>F</i>                                                    | <i>p</i>         | $\eta^2_G$  |
| Theory-of-Mind    | <b>101.48</b>                  | <b>1.703e-09</b> | <b>0.37</b> | 3.25                                      | .086        | 0.03        | 2.28                                                        | .146             | 0.01        |
| Person perception | <b>96.60</b>                   | <b>2.621e-09</b> | <b>0.55</b> | <b>7.47</b>                               | <b>.013</b> | <b>0.04</b> | <b>24.75</b>                                                | <b>6.363e-05</b> | <b>0.09</b> |
| Object-specific   | 1.45                           | .242             | 0.01        | 6.69                                      | .017*       | 0.07        | 1.60                                                        | .219             | 5.07e-03    |
| Language          | <b>29.18</b>                   | <b>2.338e-05</b> | <b>0.23</b> | 2.95                                      | .1          | 0.01        | <b>51.50</b>                                                | <b>4.487e-07</b> | <b>0.10</b> |
| Multiple-demand   | <b>18.47</b>                   | <b>.0003</b>     | <b>0.09</b> | 0.38                                      | .545        | 4.05e-03    | 0.33                                                        | .572             | 1.17e-03    |

Beta estimates were extracted for each event for each ROI and averaged across network and entered in a 2 (interaction: HHI, HRI) by 2 (dynamics: listening, speaking) repeated-measures ANOVA for each network separately. Significant effects are in bold, \* Did not survive Bonferroni correction ( $p < .05 / 5$ );  $\eta^2_G$ : generalised eta-squared.

**Table S7. Estimated posterior regression coefficient for the region-of-interest Bayesian linear model**

| <i>Network</i>    | <i>Main effect of dynamics</i> |                 | <i>Main effect of type of interaction</i> |                 | <i>Interaction between dynamics and type of interaction</i> |                      |
|-------------------|--------------------------------|-----------------|-------------------------------------------|-----------------|-------------------------------------------------------------|----------------------|
|                   | <i>Estimates</i>               | <i>CI (95%)</i> | <i>Estimates</i>                          | <i>CI (95%)</i> | <i>Estimates</i>                                            | <i>CI (95%)</i>      |
| Theory-of-Mind    | 1.99                           | 1.34 – 2.65     | 0.14                                      | -0.51 – 0.80    | 0.78                                                        | -0.08 – 1.67         |
| Person perception | 2.60                           | 2.13 – 3.05     | 0.08                                      | -0.38 – 0.54    | -0.96                                                       | -1.60 – -0.32        |
| Object-specific   | 0.37                           | -0.11 – 0.87    | -0.43                                     | -0.92 – 0.06    | -0.27                                                       | -0.94 – 0.40         |
| Language          | 1.66                           | 1.25 – 2.07     | 0.34                                      | -0.06 – 0.75    | <b>-1.14</b>                                                | <b>-1.71 – -0.58</b> |
| Multiple-demand   | 0.44                           | 0.08 – 0.80     | 0.05                                      | -0.32 – 0.40    | 0.12                                                        | -0.37 – 0.61         |

The following linear Bayesian regression model was specified:  $\text{value} \sim \text{dynamics.d} * \text{interaction.d} + (1|\text{sub})$ , with value representing the beta estimates extracted for each event for each ROI averaged across network, dynamics and type of interaction as fixed effects and a random intercept for participants (sub). Deviation coding style was used with 0.5: HHI/listening, and -0.5: HRI/speaking. Negative values for the main effects indicate a bias towards HRI or speaking, while positive values indicate a bias towards HHI or listening. CI (95%): 95% credibility interval

**Table S8. Comparison of functional connectivity between interactions with a human and robotic agent**

| <i>Network–network connectivity</i> | <i>With global signal regression</i> |       |                | <i>Without global signal regression</i> |       |               | <i>Bayesian estimation</i> |                 |
|-------------------------------------|--------------------------------------|-------|----------------|-----------------------------------------|-------|---------------|----------------------------|-----------------|
|                                     | $M_{diff}$                           | $t$   | 95% CI         | $M_{diff}$                              | $t$   | 95% CI        | <i>Estimates</i>           | <i>CI (95%)</i> |
| tom–tom                             | -0.00                                | -0.28 | -0.02, 0.02    | -0.02                                   | -1.68 | -0.04, 0.00   | -0.01                      | -0.07 – 0.04    |
| ppn–ppn                             | 0.01                                 | 0.83  | -0.01, 0.02    | -0.00                                   | -0.14 | -0.02, 0.01   | -0.01                      | -0.06 – 0.03    |
| object–object                       | 0.00                                 | 0.62  | -0.01, 0.02    | -0.00                                   | -0.15 | -0.02, 0.02   | -0.02                      | -0.06 – 0.01    |
| language–language                   | -0.00                                | -0.80 | -0.01, 0.00    | 0.00060                                 | 0.09  | -0.01, 0.01   | -0.01                      | -0.04 – 0.03    |
| demand–demand                       | 0.01                                 | 2.02  | -0.00032, 0.02 | 0.01                                    | 1.25  | -0.01, 0.02   | -0.02                      | -0.05 – 0.01    |
| tom–ppn                             | 0.01                                 | 1.32  | -0.01, 0.02    | -0.00                                   | -0.15 | -0.02, 0.01   | -0.03                      | -0.07 – 0.01    |
| tom–object                          | 0.01                                 | 1.14  | -0.01, 0.02    | -0.00                                   | -0.57 | -0.02, 0.01   | -0.02                      | -0.05 – 0.02    |
| tom–language                        | 0.01                                 | 2.65* | 0.00, 0.02     | 0.02                                    | 2.19* | 0.00092, 0.04 | -0.02                      | -0.06 – 0.01    |
| tom–demand                          | 0.00                                 | 1.03  | -0.00, 0.01    | 0.00                                    | 0.18  | -0.01, 0.02   | -0.02                      | -0.05 – 0.01    |
| ppn–object                          | 0.01                                 | 1.73  | -0.00, 0.03    | 0.01                                    | 0.63  | -0.01, 0.02   | -0.03                      | -0.06 – 0.01    |
| ppn–language                        | 0.00                                 | 1.10  | -0.00, 0.01    | 0.01                                    | 1.03  | -0.01, 0.02   | -0.02                      | -0.06 – 0.01    |
| ppn–demand                          | 0.01                                 | 2.86* | 0.00, 0.02     | 0.01                                    | 1.23  | -0.01, 0.03   | -0.02                      | -0.05 – 0.00    |
| object–language                     | 0.00                                 | 0.32  | -0.01, 0.01    | 0.00                                    | 0.32  | -0.01, 0.01   | -0.01                      | -0.04 – 0.03    |
| object–demand                       | 0.01                                 | 3.16* | 0.00, 0.02     | 0.01                                    | 1.35  | -0.01, 0.03   | -0.03                      | -0.06 – 0.00    |
| language–demand                     | 0.01                                 | 2.18* | 0.00053, 0.02  | 0.01                                    | 0.78  | -0.01, 0.02   | -0.02                      | -0.06 – 0.01    |

Paired-sample t-test was used to test for differences in functional correlation (Fisher z-transformation) between human-human and human-robot interactions for each within- and between-network combination. To test for robustness, these analyses were rerun with nuisance regression without global signal regression (but including nuisance signals from white matter, cerebrospinal fluid and global signal sources (Liu et al., 2017)). For Bayesian re-analysis, the following model was specified:  $corz \sim run * interaction + (run | sub)$ , with  $corz$  representing the Fisher z-transformed Pearson's correlation coefficients between the time courses for all possible combinations of ROIs within or between the network(s) with type of interaction (HHI, HRI) and run (1-4) as fixed effects and a random intercept and slope for participants (run | sub). Estimated posterior regression coefficient for the comparison between human-human and human-robot interaction are reported. \* Did not survive Bonferroni correction ( $p < .05 / 15$ );  $M_{diff}$ : mean difference; 95% CI: 95% confidence interval for  $M_{diff}$ ; tom: Theory-of-Mind; ppn: person perception; object: object-specific; demand: multiple-demand



**Table S9. Comparison of within- and between-network functional connectivity during interactions with a human and robotic agent across the four runs**

| <i>Network</i>                        | <i>Main effect of run</i> |          |            | <i>Main effect of type of interaction</i> |          |              | <i>Interaction between run and type of interaction HRI</i> |          |            |
|---------------------------------------|---------------------------|----------|------------|-------------------------------------------|----------|--------------|------------------------------------------------------------|----------|------------|
|                                       | <i>F</i>                  | <i>p</i> | $\eta^2_G$ | <i>F</i>                                  | <i>p</i> | $\eta^2_G$   | <i>F</i>                                                   | <i>p</i> | $\eta^2_G$ |
| Theory-of-Mind – Theory-of-Mind       | 1.48                      | .24      | 0.03       | 4.223044e-06                              | .998     | 1.001184e-08 | 0.81                                                       | .48      | 0.005      |
| Person perception – Person perception | 0.37                      | .71      | 0.01       | 1.14                                      | .30      | 0.002        | 0.09                                                       | .94      | 0.0006     |
| Object-specific – Object-specific     | 3.12                      | .04*     | 0.05       | 0.18                                      | .68      | 0.0005       | 1.28                                                       | .29      | 0.008      |
| Language – Language                   | 0.44                      | .70      | 0.01       | 0.45                                      | .51      | 0.0005       | 0.74                                                       | .51      | 0.003      |
| Multiple-demand – Multiple-demand     | 0.89                      | .44      | 0.02       | 4.39                                      | .05      | 0.008        | 0.38                                                       | .75      | 0.002      |
| Theory-of-Mind – Person perception    | 0.44                      | .67      | 0.01       | 2.57                                      | .12      | 0.004        | 0.48                                                       | .68      | 0.002      |
| Theory-of-Mind – Object-specific      | 1.24                      | .30      | 0.02       | 1.43                                      | .24      | 0.003        | 0.54                                                       | .65      | 0.003      |
| Theory-of-Mind – Language             | 1.13                      | .34      | 0.02       | 6.92                                      | .02*     | 0.008        | 0.32                                                       | .79      | 0.002      |
| Theory-of-Mind – Multiple-demand      | 0.80                      | .49      | 0.01       | 1.18                                      | .29      | 0.002        | 0.73                                                       | .50      | 0.003      |
| Person perception – Object-specific   | 1.68                      | .19      | 0.02       | 3.07                                      | .09      | 0.01         | 0.57                                                       | .61      | 0.003      |
| Person perception – Language          | 1.68                      | .19      | 0.03       | 1.24                                      | .28      | 0.001        | 1.34                                                       | .27      | 0.005      |
| Person perception – Multiple-demand   | 1.27                      | .29      | 0.02       | 7.84                                      | .01*     | 0.009        | 1.02                                                       | .38      | 0.003      |
| Object-specific – Language            | 0.88                      | .45      | 0.02       | 0.15                                      | .70      | 0.0001       | 0.24                                                       | .84      | 0.001      |
| Object-specific – Multiple-demand     | 1.61                      | .21      | 0.02       | 10.32                                     | .004*    | 0.01         | 0.46                                                       | .68      | 0.002      |
| Language – Multiple-demand            | 1.65                      | .20      | 0.03       | 5.20                                      | .03*     | 0.009        | 0.87                                                       | .45      | 0.004      |

Pearson's correlation coefficients (Fisher z-transformation) were calculated between time courses for all possible combinations of ROIs for each within- and between-network combination per interaction and entered in a 2 (interaction: HHI, HRI) by 4 (run: 1-4) repeated-measures ANOVA for each network separately. Significant effects are in bold, \* Did not survive Bonferroni correction ( $p < .05 / 15$ );  $\eta^2_G$ : generalised eta-squared.

**Table S10. Estimated posterior regression coefficient for the functional connectivity Bayesian linear model**

| <i>Network</i>                        | <i>Slope of HHI</i> |                 | <i>Slope of HRI</i> |                 | <i>Difference in slopes between HHI and HRI</i> |                 |
|---------------------------------------|---------------------|-----------------|---------------------|-----------------|-------------------------------------------------|-----------------|
|                                       | <i>Estimates</i>    | <i>CI (95%)</i> | <i>Estimates</i>    | <i>CI (95%)</i> | <i>Estimates</i>                                | <i>CI (95%)</i> |
| Theory-of-Mind – Theory-of-Mind       | 0.01                | -0.01 – 0.03    | 0.01                | -0.01 – 0.03    | 0.01                                            | -0.02 – 0.03    |
| Person perception – Person perception | 0                   | -0.02 – 0.02    | 0                   | -0.01 – 0.02    | 0                                               | -0.01 – 0.02    |
| Object-specific – Object-specific     | -0.01               | -0.03 – -0.00   | -0.01               | -0.02 – 0.01    | 0.01                                            | -0.01 – 0.02    |
| Language – Language                   | 0                   | -0.01 – 0.01    | 0                   | -0.01 – 0.01    | 0                                               | -0.01 – 0.02    |
| Multiple-demand – Multiple-demand     | 0                   | -0.01 – 0.01    | 0.01                | -0.01 – 0.02    | 0                                               | -0.01 – 0.01    |
| Theory-of-Mind – Person perception    | -0.03               | -0.07 – 0.01    | 0.01                | -0.01 – 0.03    | 0.01                                            | -0.01 – 0.02    |
| Theory-of-Mind – Object-specific      | -0.02               | -0.05 – 0.02    | 0                   | -0.02 – 0.01    | 0.01                                            | -0.01 – 0.02    |
| Theory-of-Mind – Language             | -0.02               | -0.06 – 0.01    | 0                   | -0.01 – 0.01    | 0.00                                            | -0.01 – 0.02    |
| Theory-of-Mind – Multiple-demand      | -0.02               | -0.05 – 0.01    | 0                   | -0.01 – 0.01    | 0.01                                            | -0.01 – 0.02    |
| Person perception – Object-specific   | -0.03               | -0.06 – 0.01    | 0                   | -0.02 – 0.01    | 0.01                                            | -0.01 – 0.02    |
| Person perception – Language          | -0.02               | -0.06 – 0.01    | 0                   | -0.01 – 0.01    | 0.01                                            | -0.01 – 0.02    |
| Person perception – Multiple-demand   | -0.02               | -0.05 – 0.00    | 0                   | -0.01 – 0.01    | 0.00                                            | -0.01 – 0.01    |
| Object-specific – Language            | -0.01               | -0.04 – 0.03    | 0                   | -0.01 – 0.01    | 0.00                                            | -0.01 – 0.01    |
| Object-specific – Multiple-demand     | -0.03               | -0.06 – 0.00    | 0                   | -0.01 – 0.01    | 0.00                                            | -0.01 – 0.02    |
| Language – Multiple-demand            | -0.02               | -0.06 – 0.01    | 0                   | -0.01 – 0.02    | 0.01                                            | -0.01 – 0.02    |

For Bayesian re-analysis, the following model was specified:  $corz \sim run * interaction + (run | sub)$ , with  $corz$  representing the Fisher z-transformed Pearson's correlation coefficients between the time courses for all possible combinations of ROIs for each within- and between-network combination with type of interaction (HHI, HRI) and  $run$  (1-4) as fixed effects and a random intercept and slope for participants ( $run | sub$ ). The hypothesis function was used to specify the slope for the HRI:  $run + run:interactionhri = 0$ . CI (95%): 95% credibility interval

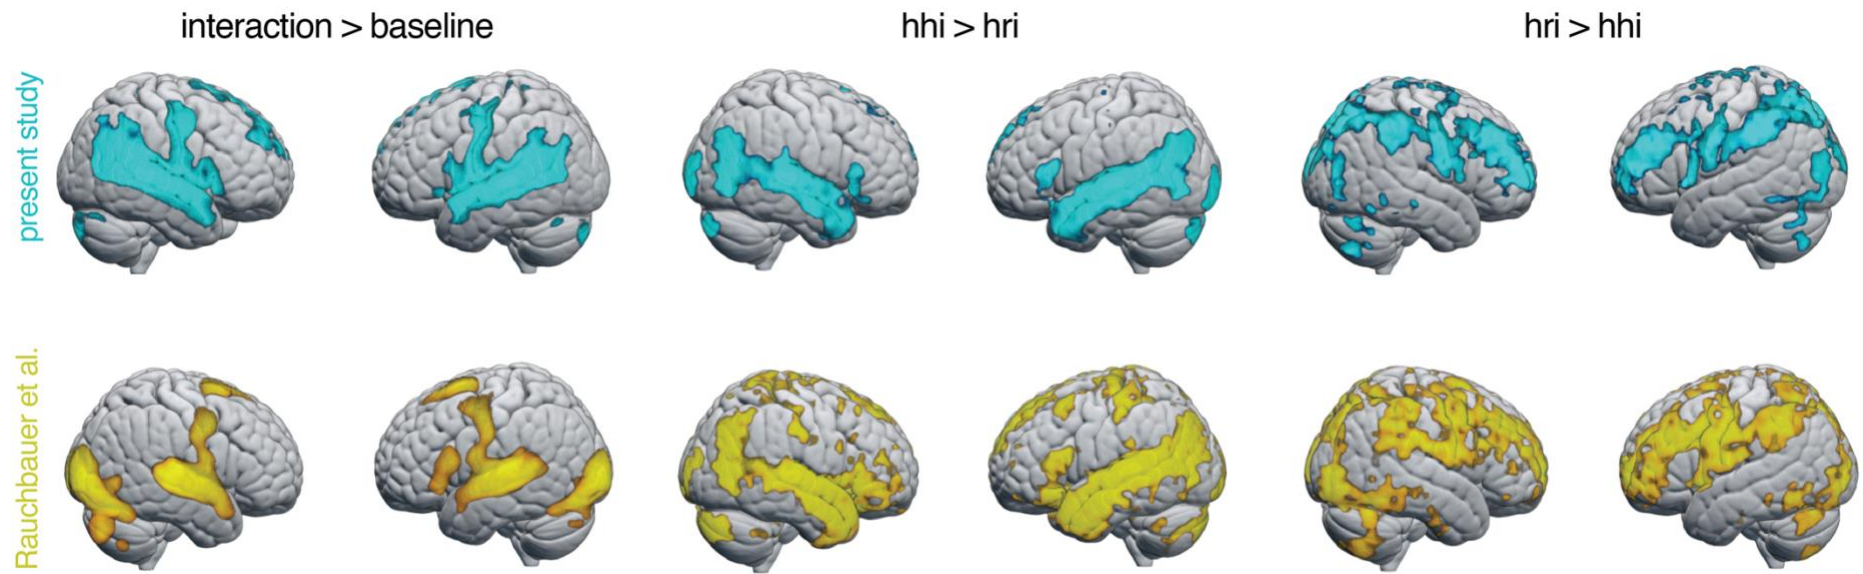

**Figure S1. Comparison of the whole-brain brain analyses between the present study and the study of Rauchbauer and colleagues (2019).** Reanalysis of the contrasts used in Rauchbauer and colleagues (2019) resulted in similar activation maps when contrasting the interactions with a human and robotic agent with the implicit baseline (c.f. instruction screen), human-human interactions (hhi) versus human-robot interactions (hri), and vice versa. For visual purposes contrast maps are shown. The maps from Rauchbauer and colleagues (2019) are obtained from <https://neurovault.org/images/112528/>.

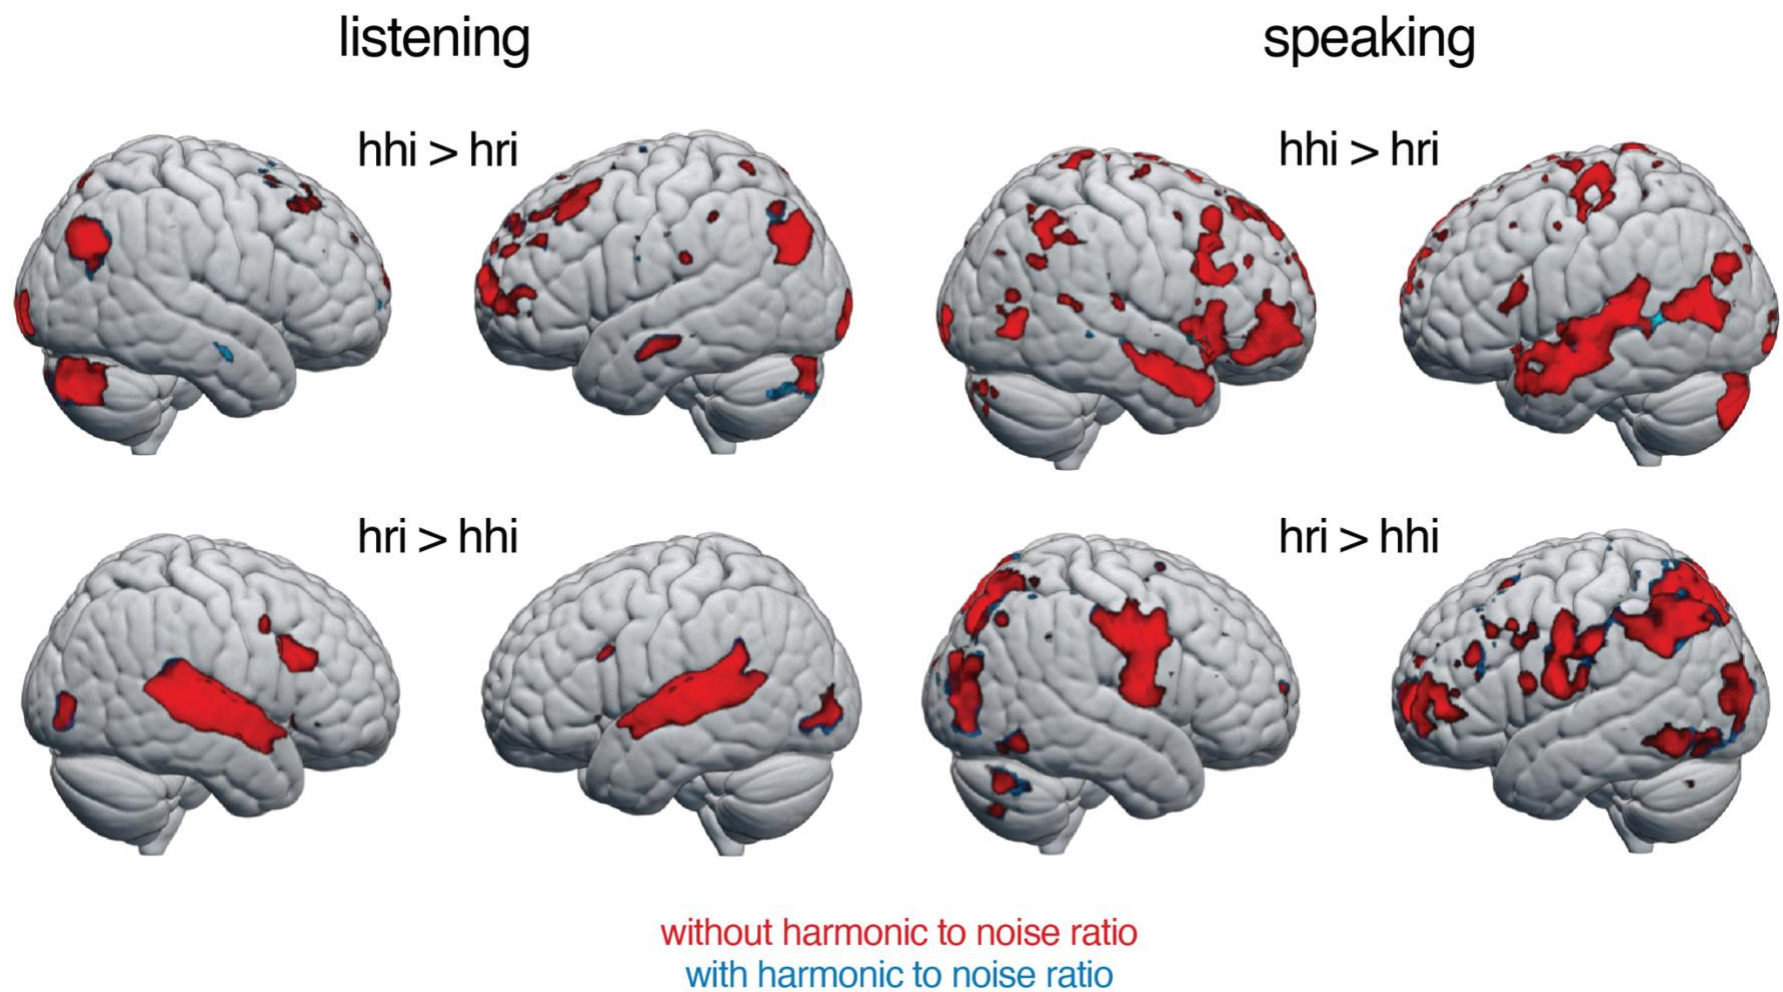

**Figure S2. Comparison of the whole-brain brain analyses with and without harmonic to noise ratio as a parametric predictor.** Similar effects were obtained when controlling for voice quality of the agent or general signal-to-noise using the mean harmonic to noise ratio (centred and scaled) as a parametric predictor. For visual purposes activation maps are shown with an uncorrected threshold of  $p < .001$  ( $k = 10$ ).

### Model coefficient for Bayesian re-analysis

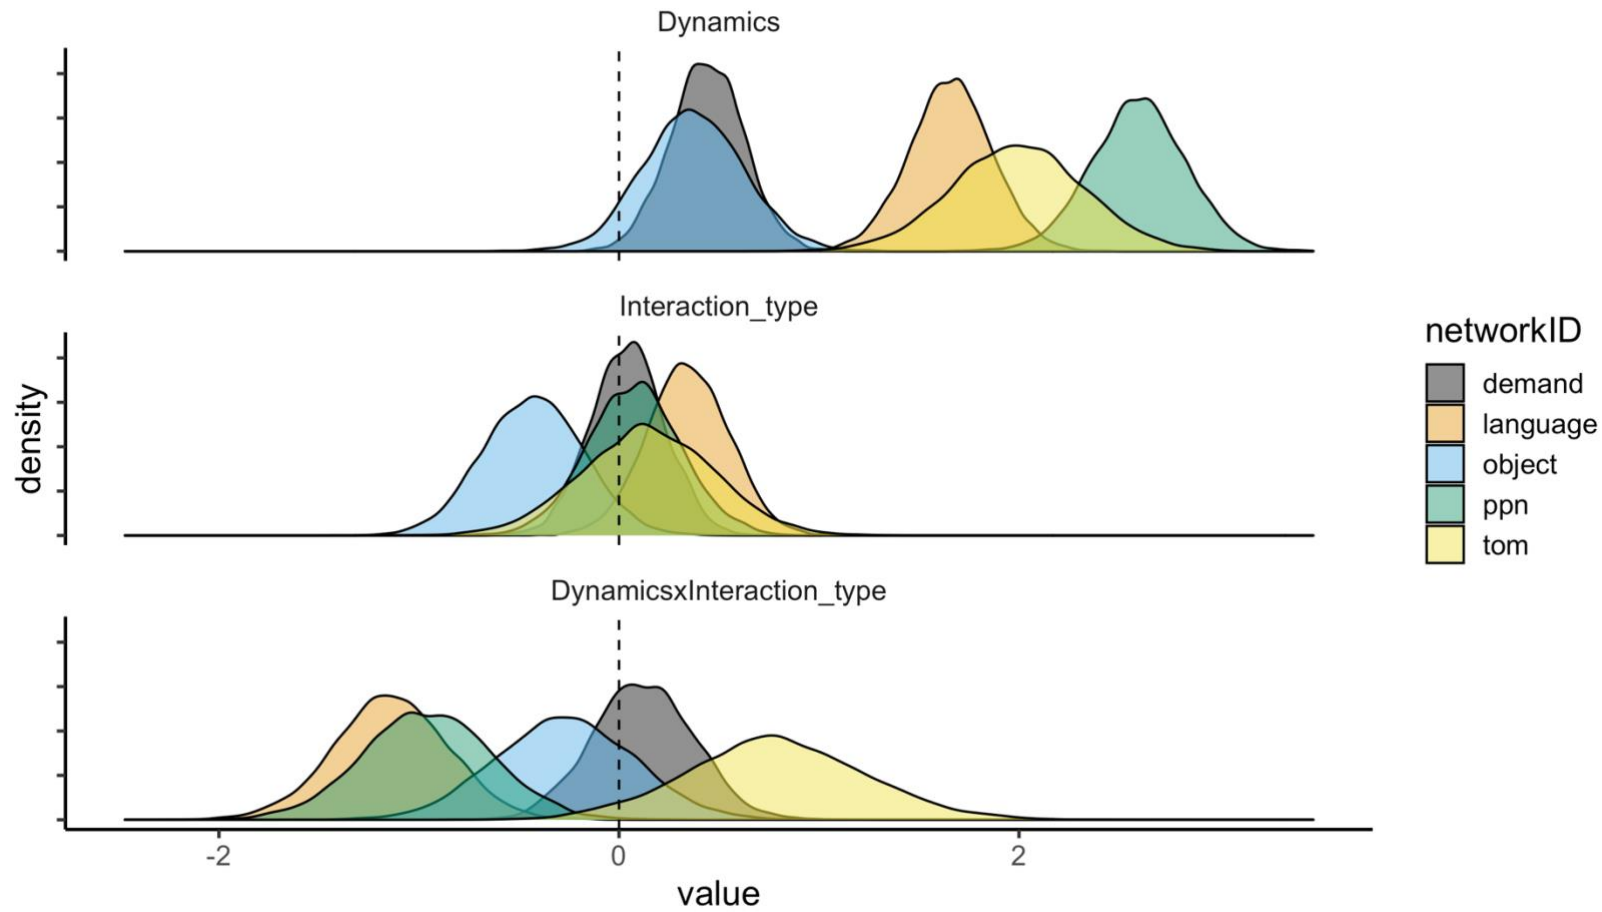

**Figure S3. Posterior distribution for the region-of-interest Bayesian linear model.** The following linear Bayesian regression model was specified:  $\text{value} \sim \text{dynamics.d} * \text{interaction.d} + (1|\text{sub})$ , with value representing the beta estimates extracted for each event for each ROI averaged across network, and dynamics and type of interaction as fixed effects and a random intercept for participants (sub). Deviation coding style was used with 0.5: HHI/listening, and -0.5: HRI/speaking. Negative values for the main effects indicate a bias towards HRI or speaking, while positive values indicate a bias towards HHI or listening.

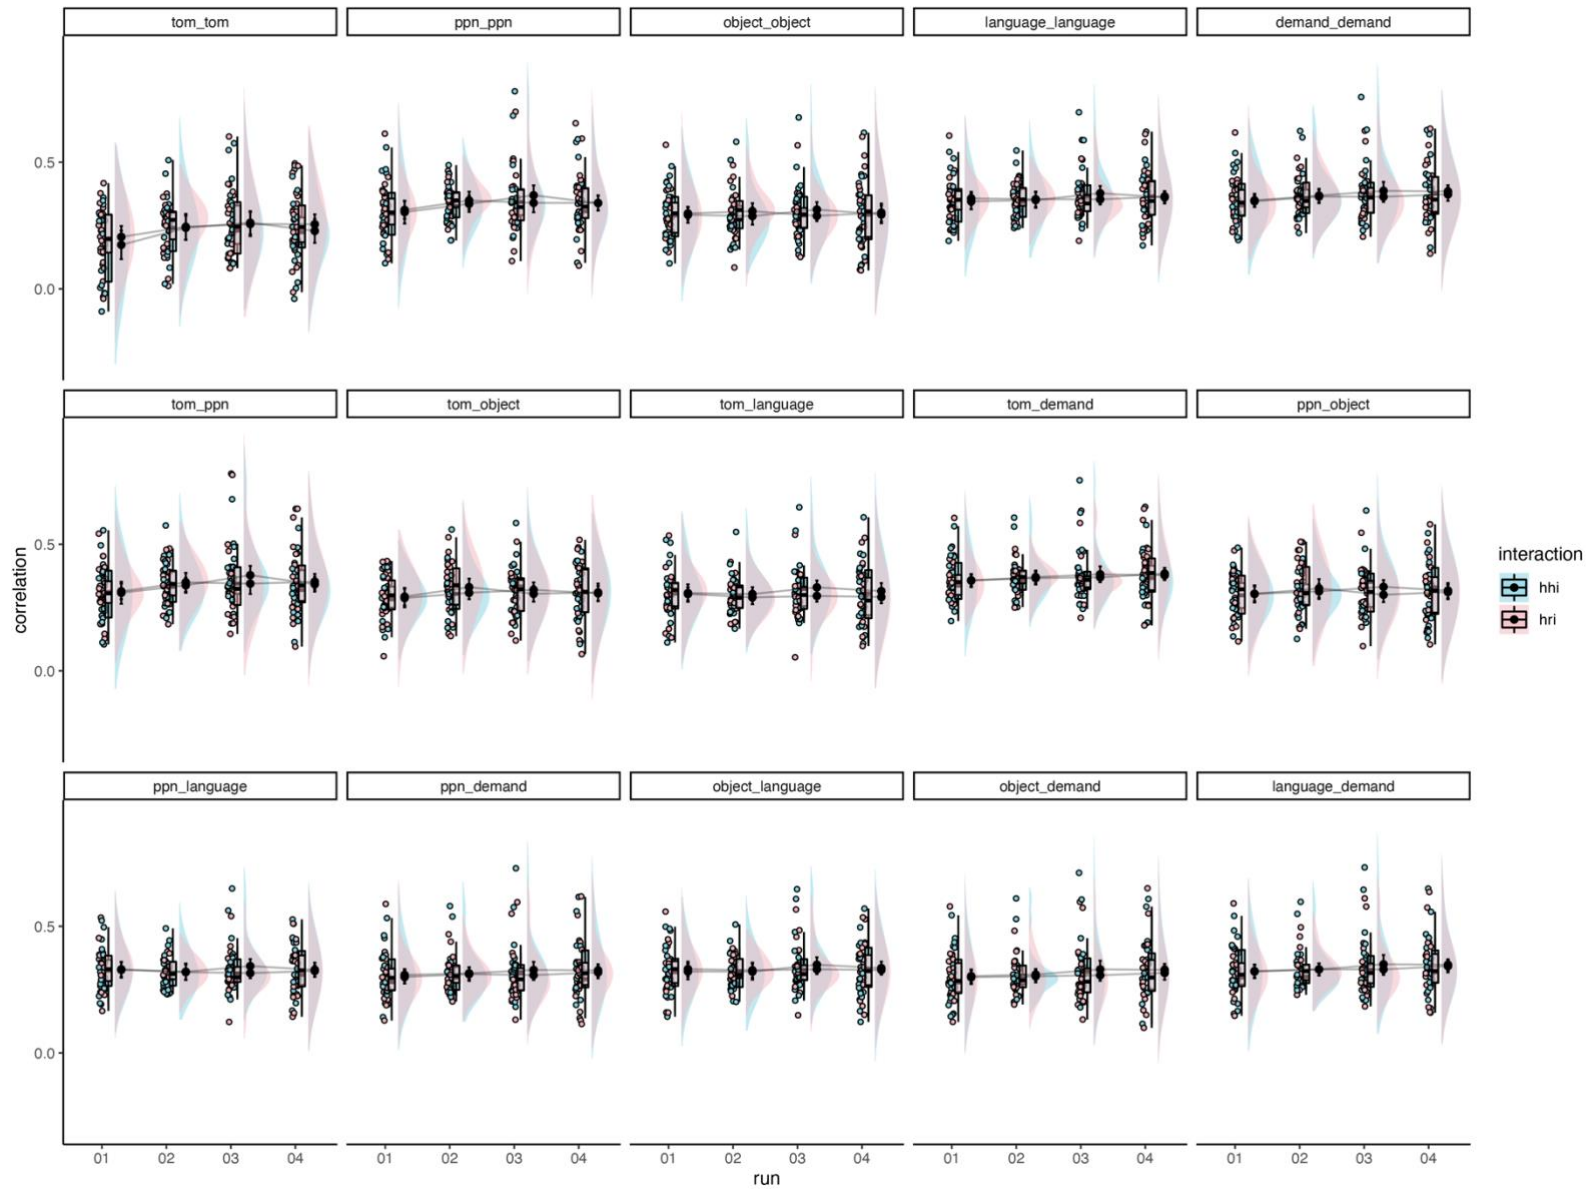

**Figure S4. No effect of repeated experience on functional connectivity during interactions with a human and robotic agent.** Within- and between-network z-transformed correlations are shown for the four runs and interaction type (human-human or human-robot interaction) separately. Rain cloud plots with errors bars reflecting 95% confidence intervals are used (Allen et al., 2021).

## References

- Allen, M., Poggiali, D., Whitaker, K., Marshall, T. R., van Langen, J., & Kievit, R. A. (2021). Raincloud plots: A multi-platform tool for robust data visualization [version 2; peer review: 2 approved]. *Wellcome Open Research*, 4, 63. <https://doi.org/10.12688/wellcomeopenres.15191.2>
- Diachek, E., Blank, I., Siegelman, M., Affourtit, J., & Fedorenko, E. (2020). The Domain-General Multiple Demand (MD) Network Does Not Support Core Aspects of Language Comprehension: A Large-Scale fMRI Investigation. *The Journal of Neuroscience*, 40(23), 4536–4550. <https://doi.org/10.1523/JNEUROSCI.2036-19.2020>
- Dubey, I., Georgescu, A. L., Hommelsen, M., Vogeley, K., Ropar, D., & Hamilton, A. F. de C. (2020). Distinct neural correlates of social and object reward seeking motivation. *European Journal of Neuroscience*, 52(9), 4214–4229. <https://doi.org/10.1111/ejn.14888>
- Henschel, A., Hortensius, R., & Cross, E. S. (2020). Social Cognition in the Age of Human–Robot Interaction. *Trends in Neurosciences*. <https://doi.org/10.1016/j.tins.2020.03.013>
- Julian, J. B., Fedorenko, E., Webster, J., & Kanwisher, N. (2012). An algorithmic method for functionally defining regions of interest in the ventral visual pathway. *NeuroImage*, 60(4), 2357–2364. <https://doi.org/10.1016/j.neuroimage.2012.02.055>
- Liu, T. T., Nalci, A., & Falahpour, M. (2017). The global signal in fMRI: Nuisance or Information? *NeuroImage*, 150, 213–229. <https://doi.org/10.1016/j.neuroimage.2017.02.036>
- Rauchbauer, Nazarian Bruno, Bourhis Morgane, Ochs Magalie, Prévot Laurent, & Chaminade Thierry. (2019). Brain activity during reciprocal social interaction investigated using conversational robots as control condition. *Philosophical Transactions of the Royal Society B: Biological Sciences*, 374(1771), 20180033. <https://doi.org/10.1098/rstb.2018.0033>
- Richardson, H., Lisandrelli, G., Riobueno-Naylor, A., & Saxe, R. (2018). Development of the social brain from age three to twelve years. *Nature Communications*, 9(1), 1027. <https://doi.org/10.1038/s41467-018-03399-2>
